# Supplementary material
Source: PubMed Central journal article supplement (PMC8432520)
Supplement: aem.00529-21-s0002.pdf [file aem.00529-21-s0002.pdf]

# **The fish pathogen *Aliivibrio salmonicida* LFI1238 can degrade and metabolize chitin despite major gene loss in the chitinolytic pathway**

Anna Skåne<sup>1</sup>, Giusi Minniti<sup>1</sup>, Jennifer S.M. Loose, Sophanit Mekasha, Bastien Bissaro, Geir Mathiesen, Magnus Ø. Arntzen and Gustav Vaaje-Kolstad\*

Faculty of Chemistry, Biotechnology and Food Science, Norwegian University of Life Sciences (NMBU), Ås, Norway

<sup>1</sup>These authors contributed equally to the work

\*Corresponding author. Email; [gustav.vaaje-kolstad@nmbu.no](mailto:gustav.vaaje-kolstad@nmbu.no)

## **Supplementary material**

## Supplementary figures

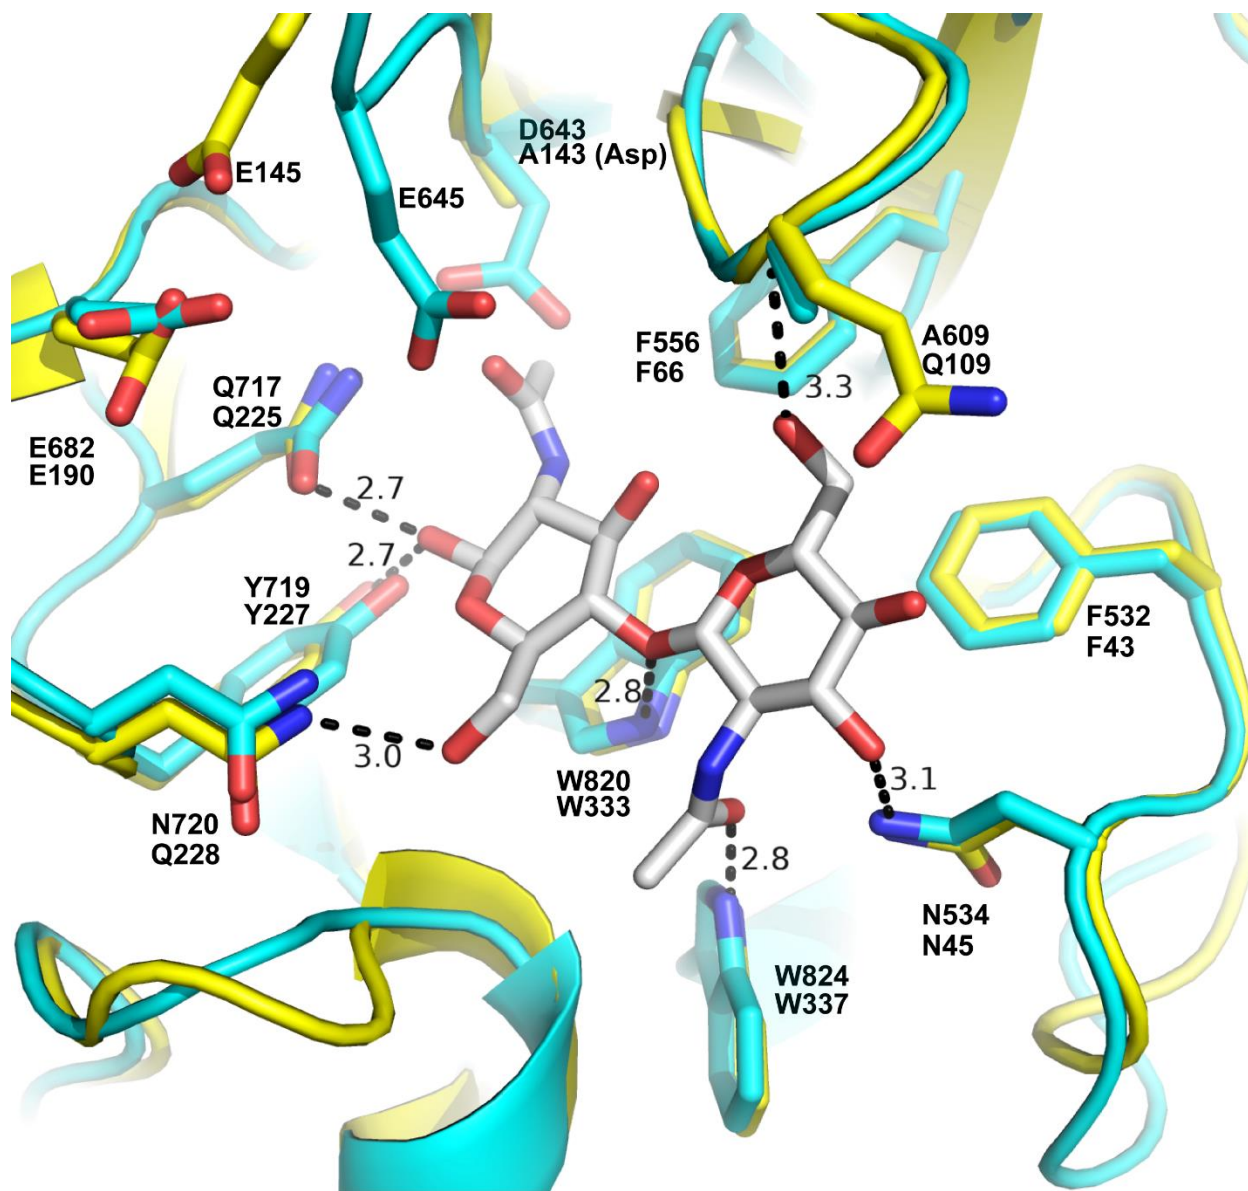

**Figure S1. Active site of the AsChi18A homology model superimposed on ChiNCTU2 (D143A variant).** Proteins are shown as cartoon representation with side chains shown in stick representation (AsChi18A colored cyan, ChiNCTU2 D143A [PDB id: 3N13] colored yellow). Side chains are labeled showing AsChi18A amino acid numbers above the ChiNCTU2 numbers. The chitobiose ligand bound in the -1 and -2 subsite of the ChiNCTU2 active is shown in stick representation with gray colored carbon atoms. Hydrogen bonds are illustrated by dashed lines and distances (Å) are indicated. It should be noted that the positioning of the ChiNCTU2 catalytic acid, E145, deviates from the position observed in the ChiNCTU2 wild type structure (which is more similar to the positioning of AsChi18A E645) due to the absence of an Asp at position 143.

### VSAI\_I0763

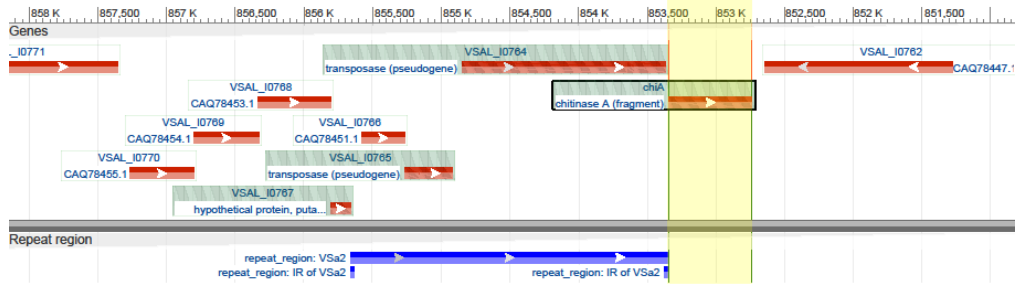

### VSAI\_I0902

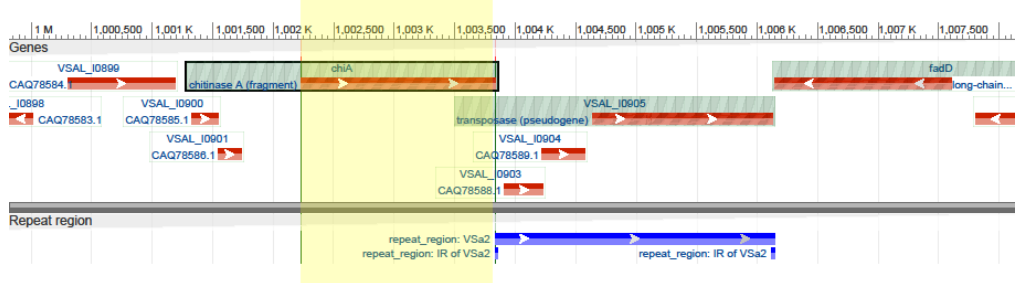

### VSAI\_I1108

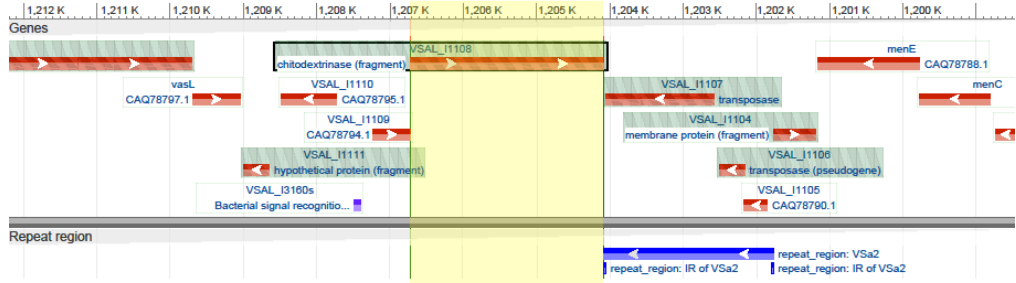

### VSAI\_I1414

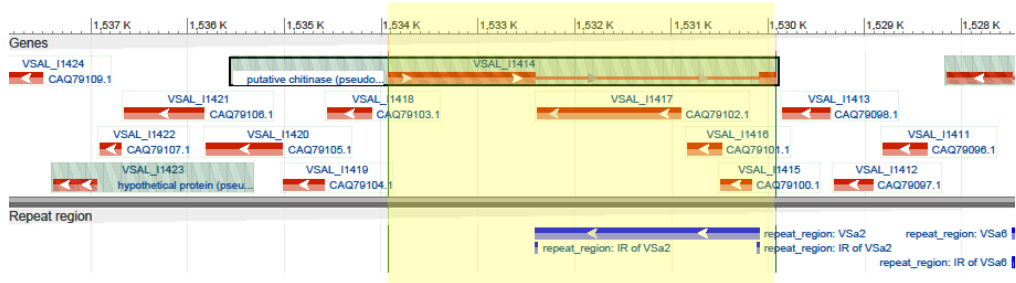

### VSAI\_I1942

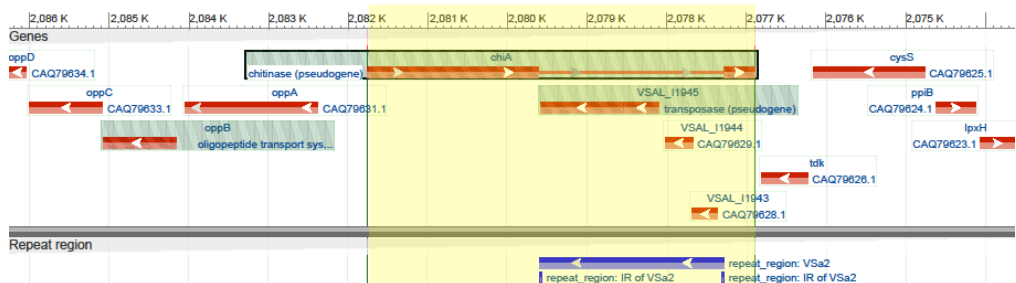

**Figure S2. Genomic arrangement of pseudogenes related to chitin catabolism.** The genomic region related to pseudogenes VSAL\_I0763, VSAL\_I0902 (*AsChi18Bp*), VSAL\_I1108 (*AsChi18Dp*), VSAL\_I1414 (*AsChi19p*) and VSAL\_I1942 (*AsChi18Cp*) are shown, the yellow highlighting indicating the region represented by the pseudogene. Potentially coding sequences are shown in red bars with white arrows indicating direction. The insertion sequence repeat region is indicated by blue bars. The illustrations were made using the NCBI Graphical Sequence Viewer (Version 3.42.0) by analysis of the *Al. salmonicida* genome sequence (Genbank identifier: FM178379.1). Further information on the occurrence and function of IS elements in *Al. salmonicida* has been published by A. Kashulin et al. (1) and can be consulted for further information on this topic.

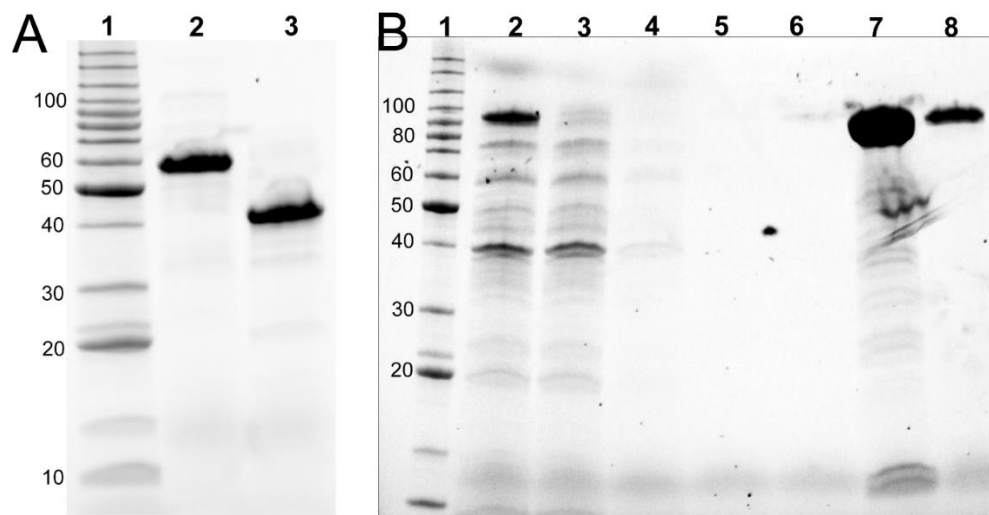

**Figure S3. Analysis of protein purity.** SDS-PAGE was used to determine protein purity. Panel A shows an SDS-PAGE gel with lanes displaying protein benchmark ladder (Invitrogen) in lane 1, *AsLPMO10A* in lane 2 and *AsLPMO10B* in lane 3. The SDS-PAGE gel in panel B displays the stages of protein purification for *AsChi18A*, showing the protein benchmark ladder in lane 1, cell free extract from an induced culture in lane 2, flow through in lane 3, wash fraction in lane 4-6 and the eluted protein in lanes 7 and 8. Only fractions containing highly pure protein were used in biochemical assays. All proteins used in biochemical assays were estimated to be >95% pure.

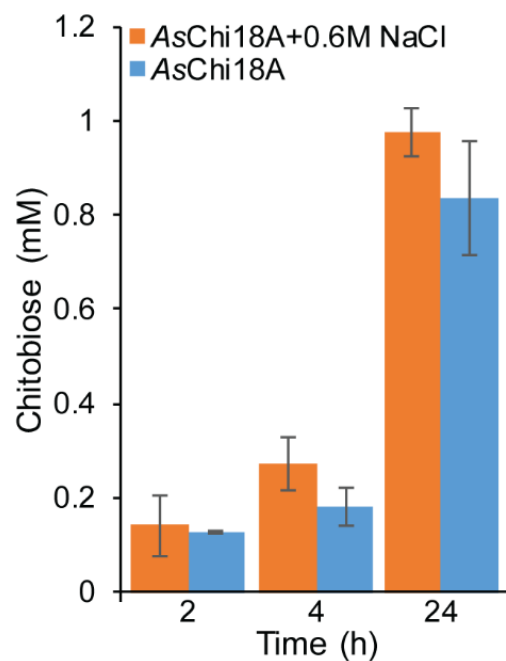

**Figure S4. Influence of NaCl on AsChi18A activity.** The amount of (GlcNAc)<sub>2</sub> (chitobiose) released from 10 mg/mL  $\beta$ -chitin in Tris-HCl pH 7.5 by 1.0  $\mu$ M AsChi18A in the presence and absence of 0.6 M NaCl was evaluated at three time points (n=3). Reactions were incubated at 30°C.

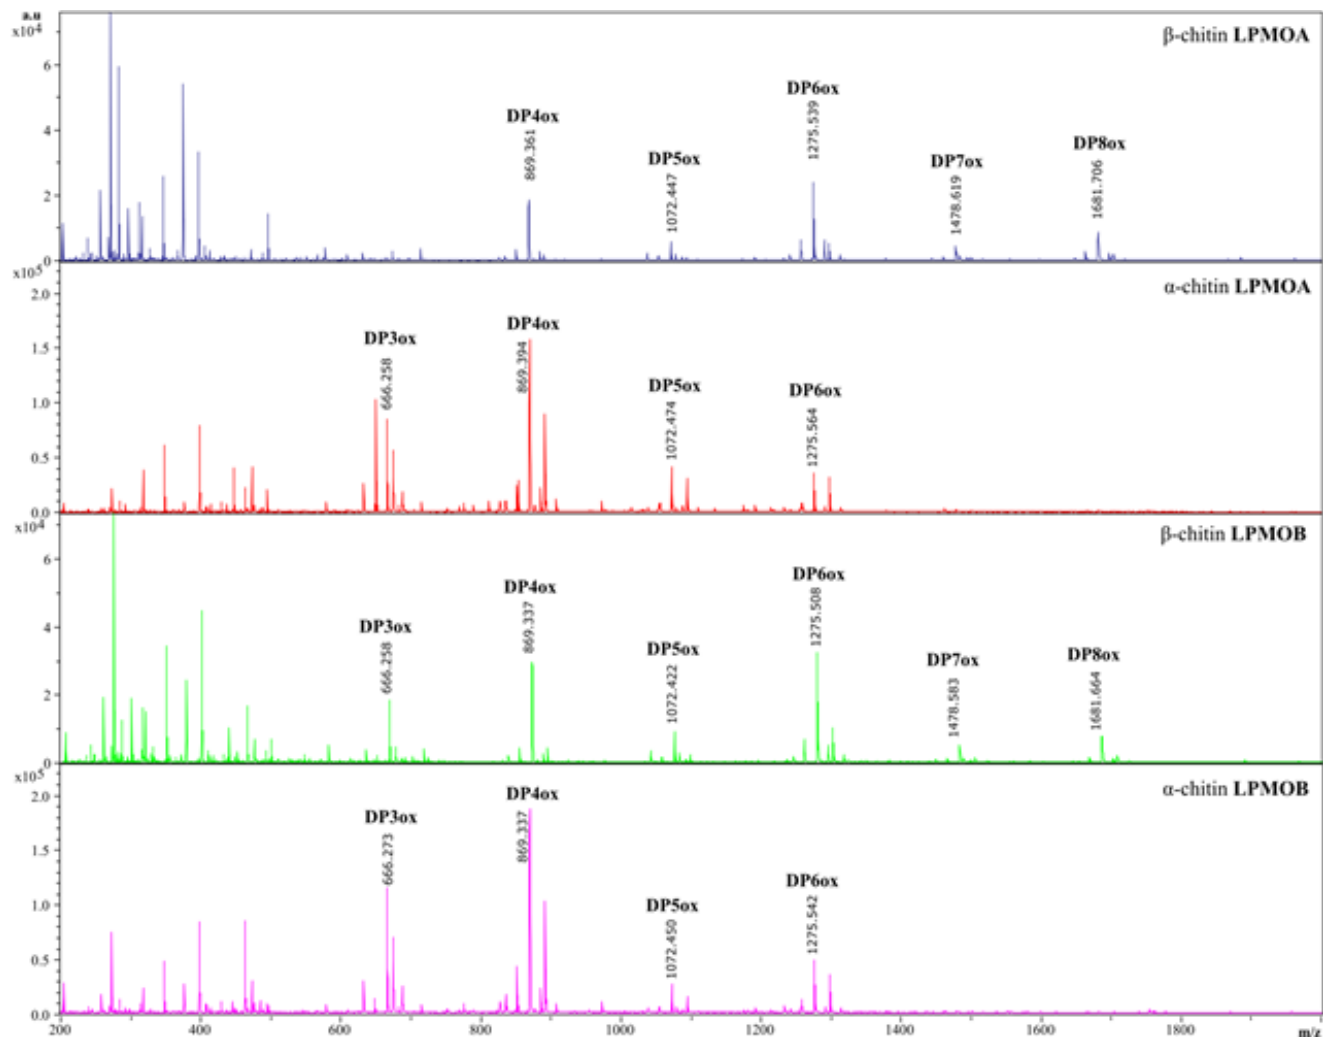

**Figure S5.** MALDI-TOF MS analysis of oxidized products generated by *AsLPMO10A* and **-B** from *A. salmonicida* on chitin ( $\alpha$  and  $\beta$ ). The MS spectra show soluble C1 oxidized chito-oligosaccharides, i.e. aldonic acids. The degree of polymerization of each product is indicated by “DPn ox”, where n equals the number of monosaccharides in the chain. The main peaks are labelled with the respective masses.

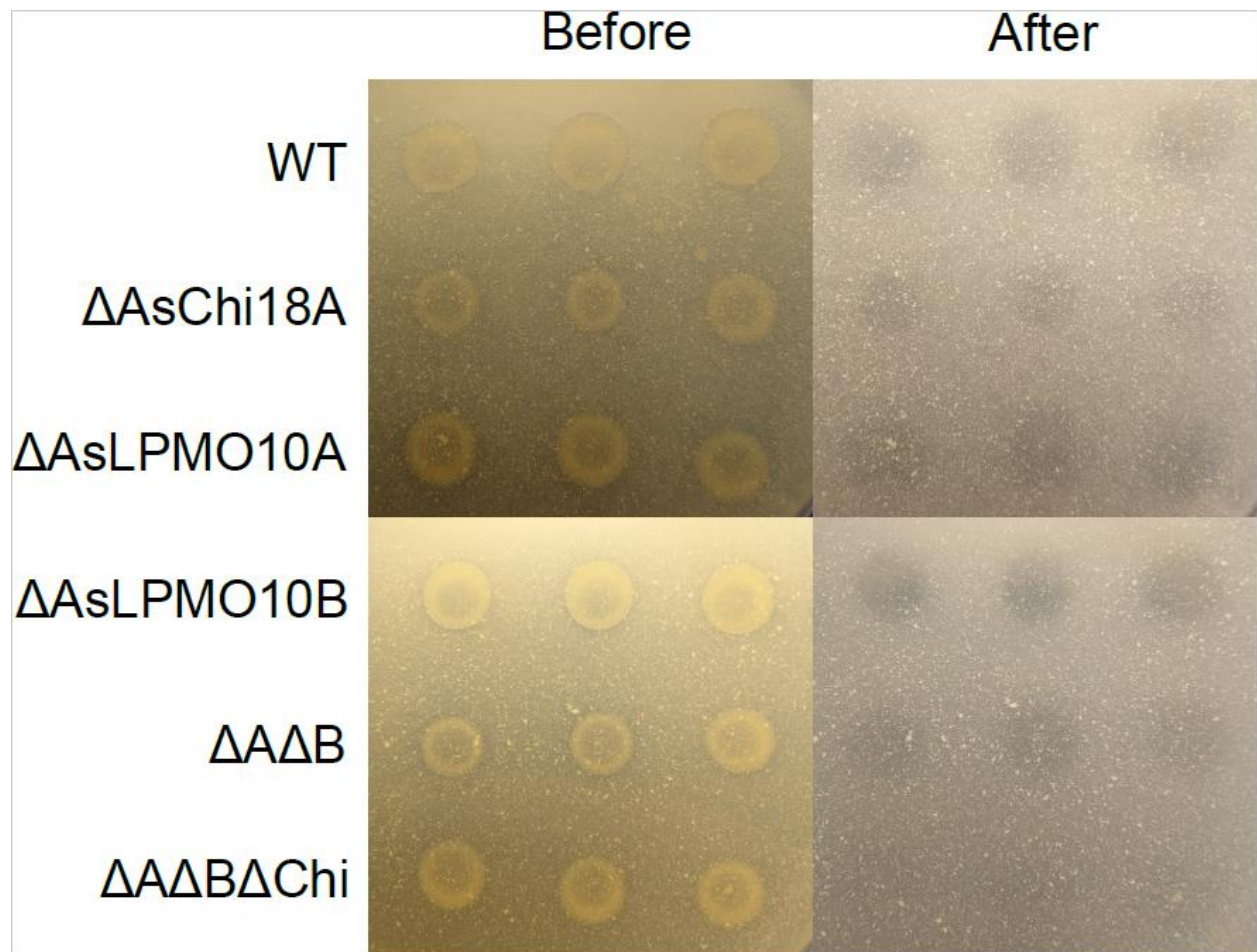

**Figure S6. Chitin degradation assay.** Images show photographs of agar plates containing LB25 supplemented with 2% colloidal chitin with *Al. salmonicida* variants (indicated on the left side of the image) spotted in triplicate and allowed to grow at 12 °C for 20 days. The photographs show the agar plates before (left) and after (right) the colonies had been removed by gentle washing. Halos indicate chitin degradation.



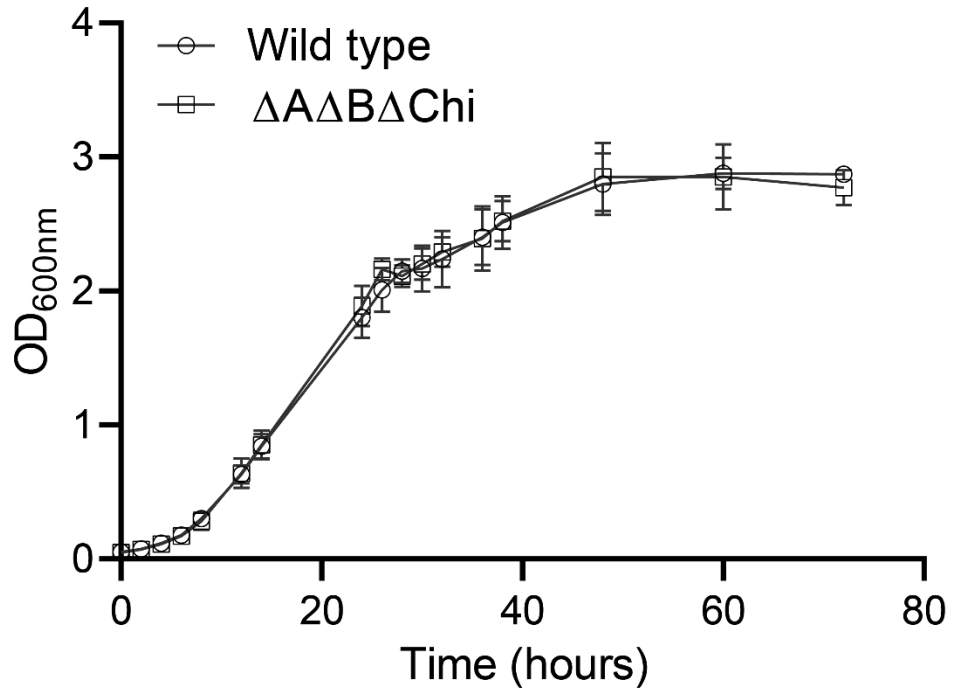

**Figure S7. Growth of *Al. salmonicida* LFI1238 variants.** Growth of the wild type *Al. salmonicida* LFI1238 strain compared to the triple knock-out strain ( $\Delta A\Delta B\Delta Chi$ ) in LB25 broth. Standard deviation is indicated by error bars (n=3).

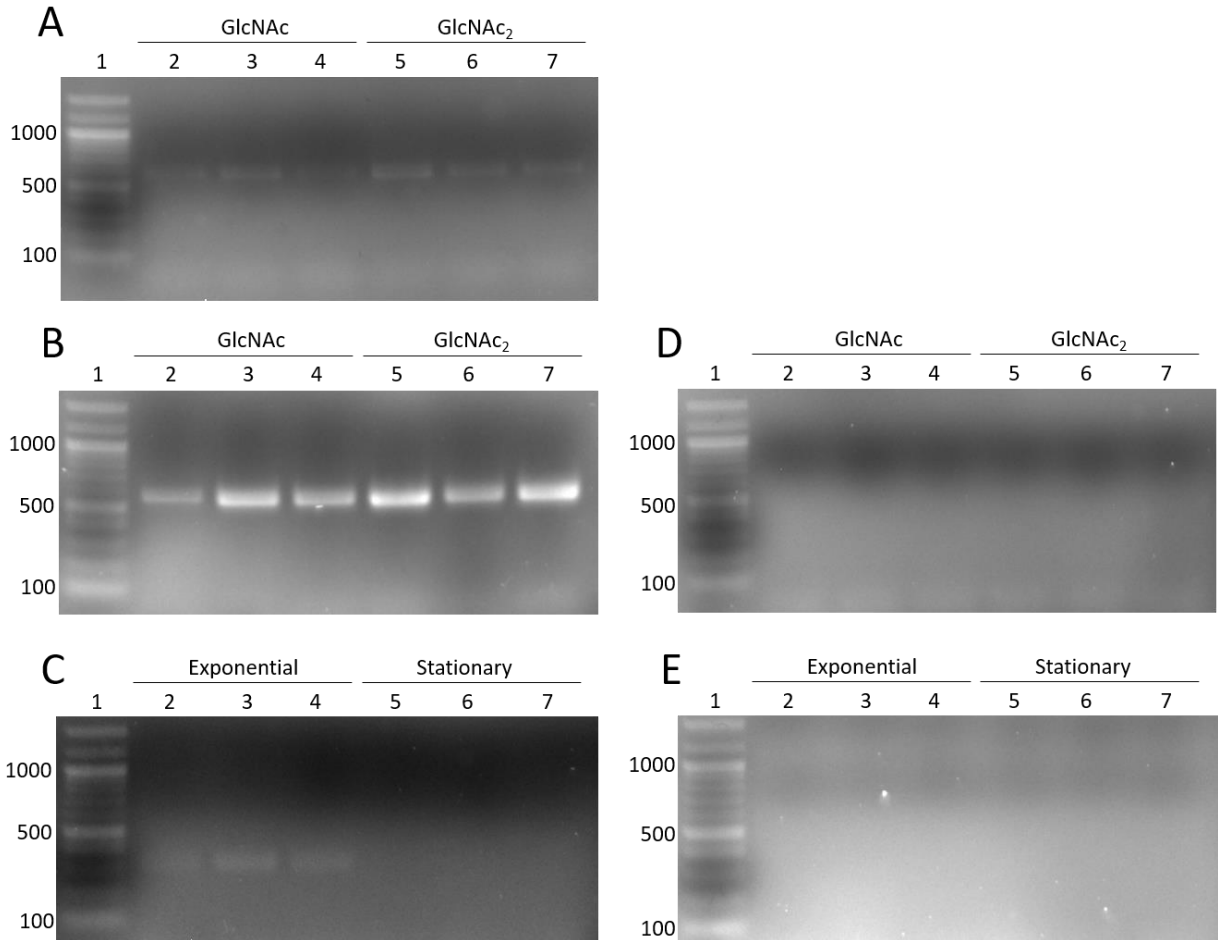

**Figure S8. Gene expression analysis by PCR amplification of cDNA.** Panel A and B shows the products formed in PCR experiments using cDNA from samples obtained during exponential growth in GlcNAc and GlcNAc<sub>2</sub> combined with primer pairs *GH18Expression* and *10AExpression*, respectively. Panel D shows the PCR experiments using -RT controls as template combined with primer pair *10AExpression*. The -RT templates used in Panel D corresponds to the cDNA applied to Panel A and B. Panel C shows the products formed in PCR experiments using cDNA from samples obtained during exponential and stationary growth in glucose combined with primer pair *I0902Expression*. In this case gene expression was evaluated as positive (+) during exponential growth (lane 2-4) and negative (-) during stationary growth (lane 5-7). Panel E shows the products formed in PCR experiments using the -RT samples corresponding to the cDNA template used in Panel C combined with primer pair *I0902Expression*. Lane 1; 100 bp DNA ladder, lanes 2-4 or 5-7; biological replicates within the same condition.

```

B6EGV7_ALISL      1 MKKTLALTVSSIIILSTPSLASAPNTNLNLMYPYPQSVELKSGKLPIDNNFSIYIDGYKSE
D9ISD9_VIBHA      1 -----MGGSGQGKITLDKFSIYIKGYDSP

B6EGV7_ALISL     61 RIQQLAQRIIKRIEAQTGLPLLSPFNSSEKNATLIIRVNKAAKKEIQDNHIDESYQLSVN
D9ISD9_VIBHA     26 RVQFNARKTMDRLYRQTGLPMLNWHAESEKDATLVIDIRNAPKSEVQDIHSDESYLESR

B6EGV7_ALISL    121 QKQIILQAERPYPGIVIRGAETFLQLITTSKNGYSVPQIITIEDQPRFPWRGASFDSRHFVS
D9ISD9_VIBHA     86 NGQIIRSERPYGAFHGLETFLLQVTTDATGYFVPAVSIQDEPRFPWRGVSYDTSRHFIE

B6EGV7_ALISL    181 IETIKRQIDGFASAKMNVFHWHLWDDQAIRIQIESYPKLWQKTADGDVYTKKEIKDVIIEY
D9ISD9_VIBHA    146 LDVILRQLDAMASAKMNVFHWHLWDDQAIRIQLDNYQSLWQDTADGDYVYTKDEIRYVVNY

B6EGV7_ALISL    241 ARLRGIRVIPEISLPGHASGVAHAYPELMSGEGKQSYEQRAWGVFVPLMNPPLNPELYIF
D9ISD9_VIBHA    206 ARNLGIRVIPEISLPGHASAVAHAYPELMSGMGESQSYPHQRCGWGVFEPLMDPTNPELYKM

B6EGV7_ALISL    301 FDNVFSSEVTDLFPDEYIHIIGGDEPNYQQWSNNKKIQAFIKENNDGNGRLQSYLNARIEK
D9ISD9_VIBHA    266 LASVFEDEVVELFPDEYFHIIGGDEPNYQQWKDNPKIQQFIKDNNDGERGLQSYLNTKVEQ

B6EGV7_ALISL    361 MINDKGGKIMGWDEIWHKDLPTSIVIQSWRGHDSIGQAAKEGYAGLILSTGFYLDQPQPTS
D9ISD9_VIBHA    326 MLEQRGGKMTGWDEIWHKDLPTSIVIQSWRGHDSIGRAAKEGYQGILSTGYYLDQPQPTS

B6EGV7_ALISL    421 YHYRNDPMPKGPQVDDQHQGESFETYTWQKPRGKGGPRKGTLTITITSKEGNARAFTDYN
D9ISD9_VIBHA    386 YHYRNDPMPKGITVDDQLHQGEKFATYDWWKPRNKGGPRTGNLTIIEATDGSYRAFTDYN

B6EGV7_ALISL    481 GKSRAKVDIIEYTKGESFRGHFDNFMSYTEFNLTMDNRQFSDGSYQLIGNVRWPTTGETL
D9ISD9_VIBHA    446 GKSREEVFIIEYVPGVKFKGHFDNFMSYTEFNDFAGGKLDSSYQLIGNVRWPATGELV

B6EGV7_ALISL    541 ASSSMKGTKIEKPTGGYPVALNEKEQVLILGGEAAIWAENYDDLTVEARIWPRTYAVGER
D9ISD9_VIBHA    506 ASSDMEGGSVIPEPNGGYPALTEKEQPLILGGEITIWGENLDSMTIEQRLWPRSYAVAER

B6EGV7_ALISL    601 LWSAESLTDEDSMYKRLVMMNWTATISVGLQHQANSYKQYLRLA-----SFANYAE
D9ISD9_VIBHA    566 LWSSQDLTDERSMYKRMKVMDTWSEISLGLRHHADANIMLKRLANGADETPLQTLAKYTE

B6EGV7_ALISL    652 PAQYYARNWAKFNATDPKGELYNQYERLNRFDVAVPVESLAVLKMMSL-ATTATNTPSDL
D9ISD9_VIBHA    626 PAQYYARHWKWKWISTPNEGDLNQYERLNRFDALPVESTAVYEMQDLVAAYALGDKTAL

B6EGV7_ALISL    711 QELKRHYQTVLDSAIKSKPIFENNIASIDTAPLAEKHKEVATAALELIAILEKGNKPTST
D9ISD9_VIBHA    686 DALAMHYQSVKLAQQAKPIFAANVASVETVPVAEAAIKVADLGLTLIELAKQGSDISQS

B6EGV7_ALISL                                771 QLRHVISVTTTASGMYDEMIVAIVRPTEELVRQLRKQ
D9ISD9_VIBHA    746 DAEAYQRIINENAIIFDETIVAIIVVPTPELLHTLTD-

```

**Figure S9.** Pairwise sequence alignment of the *Al. salmonicida* GH20 (UniProt ID B6EGV7) and *Vibrio harvey* GH20 *VhNAG1* (UniProt ID D9ISD9). The alignment was made using the EMBOSS pairwise sequence alignment tool using default parameters. The Alignment was formatted using BoxShade. Based on data from W. Suginta et al. (2), catalytic amino acids are shown in red shading and amino acids involved in substrate binding are shown in blue shading.

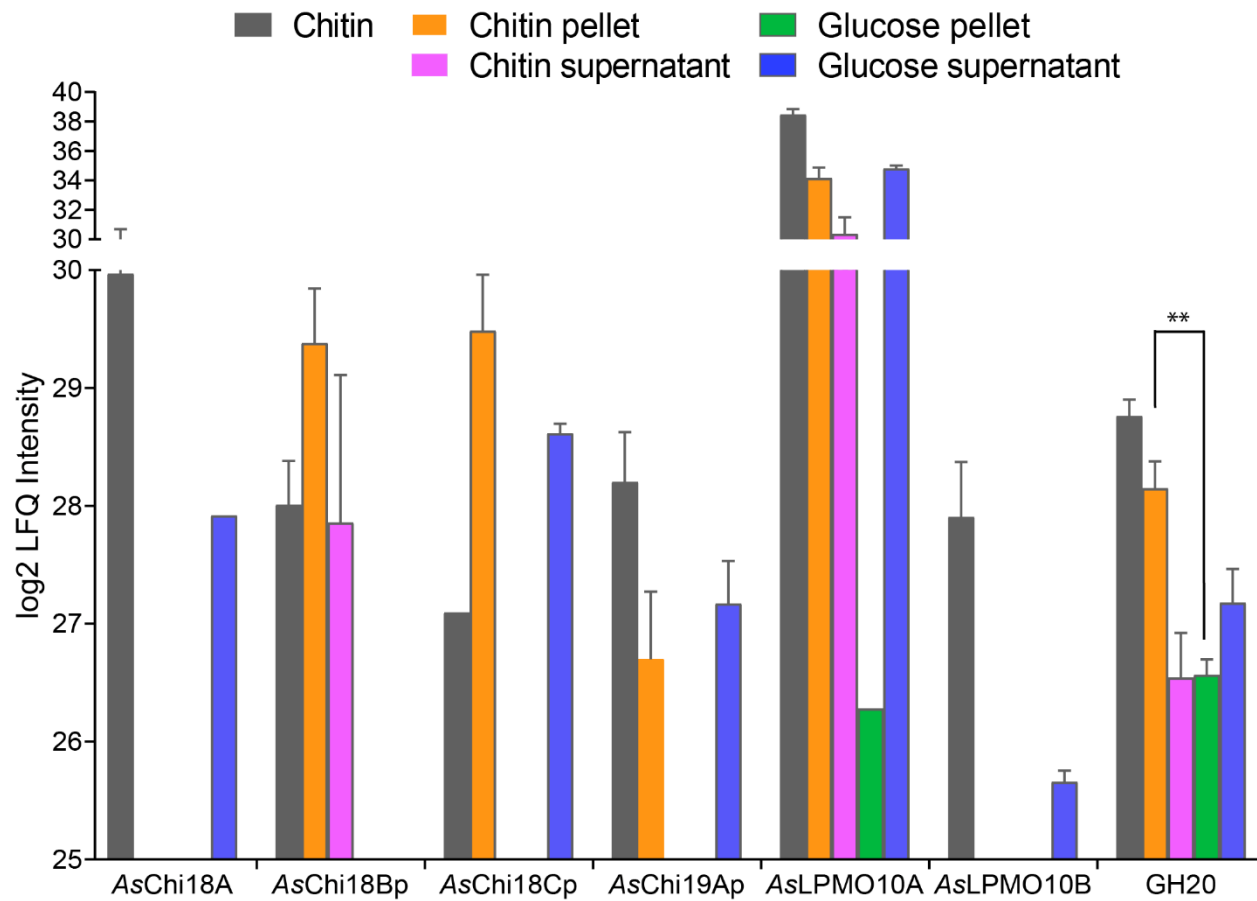

**Figure S10. *Al. salmonicida* protein abundances.** The abundance of selected *Al. salmonicida* proteins related to chitin catabolism displayed in bar chart format as a supplement to Figure 9. Log<sub>2</sub> LFQ values shown represent the average values obtained from the label free proteomics data (Supplementary Dataset 1). Error bars are shown for proteins that were detected in two or three biological replicates. The GH20  $\beta$ -*N*-acetylhexosaminidase was calculated to have a statistically significant 1.58 log<sub>2</sub> fold higher abundance during growth on chitin compared to glucose ( $p=0.0082$ ; paired two-tailed t test).

|            |     |                                                             |     |
|------------|-----|-------------------------------------------------------------|-----|
| OCH20886.1 | 1   | MALLTNKMKLNTIALALLGAGFSVQSHANDMTNPEGGI VVGWYHWNWCDGR        | 50  |
| VSAI_I0763 | 1   | -----                                                       | 0   |
| OCH20886.1 | 51  | GYQAGNAPCMTLKETNPMYVVDISFMKVYDTAEGRIPTFRLDPTVGLSE           | 100 |
| VSAI_I0763 | 1   | -----                                                       | 0   |
| OCH20886.1 | 101 | AEFIEQIKELNAQGRSVVIALGGADAHIELKRGDETAFADEI IRLVEVYG         | 150 |
| VSAI_I0763 | 1   | -----                                                       | 0   |
| OCH20886.1 | 151 | F <b>DGLDIDLE</b> QA AVTAADNQWVIPEALKMVKDHYRTQGNFLITMAPEFPY | 200 |
| VSAI_I0763 | 1   | -----                                                       | 0   |
| OCH20886.1 | 201 | LKAGDKYIPYLERLEGGYDWINPQFYNQGGDGVWVDEENAWITQNSDAMK          | 250 |
| VSAI_I0763 | 1   | -----                                                       | 0   |
| OCH20886.1 | 251 | EKFIIYISDSLINGTRGFHKIPHDKLVFGIPTNSDAAATGFVKEPQDLYN          | 300 |
| VSAI_I0763 | 1   | -----                                                       | 0   |
| OCH20886.1 | 301 | AFDALKQQGQPLRGVMTWSINWDVGTDAAGTPYNSSFINDYGPYVHGQTP          | 350 |
| VSAI_I0763 | 1   | -----                                                       | 0   |
| OCH20886.1 | 351 | PPPVGKPVFSGLSDRVQHGTVFSPLAGVKAMDKEDGDTVSSITVEGSV            | 400 |
| VSAI_I0763 | 1   | -----                                                       | 0   |
| OCH20886.1 | 401 | NTQVLGDNVLTYSVTDSGNETKQGRNVEVYSALPELTGVTNTTIKIDSA           | 450 |
| VSAI_I0763 | 1   | -----                                                       | 0   |
| OCH20886.1 | 451 | FDPLTGVKATDAEDGLTSQINVEGSVDTTLAGKYSLTYSVKDSANQTAT           | 500 |
| VSAI_I0763 | 1   | -----                                                       | 0   |
| OCH20886.1 | 501 | ATRVTVNDGSEVCVTPWKADQVYLTDETTSHNGKTWQAGWWTQGDEPGT           | 550 |
| VSAI_I0763 | 1   | -----HNGKTWQADWWTQGDEPGT                                    | 19  |
| OCH20886.1 | 551 | TGEWGVWKLIGDTCGGVIPDPEAELSAKITGLSNEYSVIDSAAITFTTI           | 600 |
| VSAI_I0763 | 20  | TGEWGVWKLIGDTCGGVIPDPEAELSAKITGLSNEYSVIDSAAITFTTI           | 69  |
| OCH20886.1 | 601 | TTNEMASTTVDIIDRMGNSVTSYSEQVTGTQAISLPLTNVEEGYYSMRLI          | 650 |
| VSAI_I0763 | 70  | TTNEMASTTVDIIDRMGNSVTSYSEQVTGTQAISLPLTNVEEGYYSMRLI          | 119 |
| OCH20886.1 | 651 | ASNDDNSVEERYSFNLVSEDTTTPTTDVPAYEAGKTYAEGDQVLATDGN           | 700 |
| VSAI_I0763 | 120 | ASNDDNSVEERYSFNLVSEDTTTPTTDVPAYEAGKTYAEGDQVLATDGN           | 169 |
| OCH20886.1 | 701 | VYQCKAWPYTPWCSSSAYAPAESQLWANAWDKK 733                       |     |
| VSAI_I0763 | 170 | VYQCKAWPYTPWCSSSYAPAESQLWANAWDKK 202                        |     |

**Figure S11.** Pairwise sequence alignment of VSAI\_I0763 (family GH18 chitinase fragment) and a *Aliivibrio logei* family GH18 chitinase (genebank accession OCH20886.1). The family GH18

catalytic chitinase sequence motif is indicated by yellow highlighting. The sequence alignment was made using EMBOSS Needle with default parameters.

```

OCH20886.1      1 MALLTNKMKLNTIALALLGAGFSVQSHANDMTNPEGGIVVGYWHNWC DGR      50
  |||
VSAL_I0902      1 MALLTNKMKLNTIALALLGAGFSVQSHANDMTNPEGGIVVGYWHNWC DGR      50

OCH20886.1     51 GYQAGNAPCMTLKETNPMYNNVVDISFMKVYDTAEGRIPTFRLDPTVGLSE  100
  |||
VSAL_I0902     51 GYQAGNAPYMTLKETNPMYNNVVDISFMKVYDTAEGRIPTFRLDPTVGLSE  100

OCH20886.1    101 AEFIEQIKELNAQGRSVVIALGGADAHIELKRGDETAFADEIIRLVEVYG  150
  |||
VSAL_I0902    101 AEFIEQIKELNAQGRSVVIALGGADAHIELKRGDETAFADEIIRLVEVYG  150

OCH20886.1    151 F DGLDIDLEQA AVTAADNQWVIPEALKMVKDHYRTQGNFLITMAPEFPY  200
  |||
VSAL_I0902    151 F DGLDIDLEQA AVTAADNQWVIPEALKMVKDHYRTQGNFLITMAPEFPY  200

OCH20886.1    201 LKAGDKYIPYLERLEGGYDWINPQFYNQGGDGVWVDEENAWITQNSDAMK  250
  |||
VSAL_I0902    201 LKAGDKYIPYLERLEGGYDWINPQFYNQGGDGVWVDEENAWITQNSDAMK  250

OCH20886.1    251 EKFIYYISDSLINGTRGFHKI PHDKLVFGIPTNSDAAATGFVKEPQDLYN  300
  |||
VSAL_I0902    251 EKFIYYISDSLINGTRGFHKI PHDKLVFGIPTNSDAAATGFVKEPQDLYN  300

OCH20886.1    301 AFDALKQQGQPLRGVMTWSINWDVGTDAAGTPYNSSEFFINDYGPYVHGQTP  350
  |||
VSAL_I0902    301 AFDALKQQGQPLRGVMTWSINWDVGTDAAGNPYNSSEFFINDYGPYVHGQTP  350

OCH20886.1    351 PPPVVGKPVFSGLS DTRVQHGT VFSPLAGVKAMDKEDGDVTSSITVEGSV  400
  |||
VSAL_I0902    351 PPPVVGKPVFSGLS DTRVQHGT VFSPLAGVKAMDKEDGDVTSSITVEGSV  400

OCH20886.1    401 NTQVLGDNVLTYSVTDS DGNETKQGRNVEVYSALPELTGVTNTTIKIDSA  450
  |||
VSAL_I0902    401 NTQVLGDNVLTYSVTDS DGNETKQGRNVEVYSALPELTGVTNTTIKIDST  450

OCH20886.1    451 FDPLTGVKATDAEDGDLTSQINVEGSDVDTTLGKYSLTYSVKDSANQTAT  500
  |||
VSAL_I0902    451 FDPLAGVKATDAEDGDLTPQINVEGSDVDTTLGKYSLTYSVKDSANQTAT  500

OCH20886.1    501 ATRTVTVNDGSEVCVTPWKADQVYLTDETTSHNGKTWQAGWWTQGDEPGT  550
  |||
VSAL_I0902    501 ATRTVTVNDGSEVCVSPWKADQVYLTDETTSHN-----  533

OCH20886.1    551 TGEWGVWKLIGDTCGGV I PDPEAELSAKITGLSNEYSVIDSAATITFTI  600
VSAL_I0902    534 -----  533

OCH20886.1    601 TTNEMASTTVDIIDRMGNSVTSYSEQVTGTQAISLPLTNVEEGYYSRLL  650
VSAL_I0902    534 -----  533

OCH20886.1    651 ASNDDNSVEERYSFNLVSEDTTTPPTTDVPAYEAGKTYAEGDQVLATDGN  700
VSAL_I0902    534 -----  533

OCH20886.1    701 VYQCKAWPYTPWCSSSAYAPAESQLWANAWDKK      733
VSAL_I0902    534 -----  533

```

**Figure S12.** Pairwise sequence alignment of VSAL\_I0902 (family GH18 chitinase fragment) and a *Aliivibrio logei* family GH18 chitinase (genebank accession OCH20886.1). The family GH18

catalytic chitinase sequence motif is indicated by yellow highlighting. The sequence alignment was made using EMBOSS Needle with default parameters.



|               |     |                                                              |     |
|---------------|-----|--------------------------------------------------------------|-----|
| WP_065610756. | 1   | MEHSNLKRKHNYKFTLSTLTISCLMAFNAQAAIDCGPLNTWSGDTVYNGG           | 50  |
| VSAL_I1108    | 1   | -----                                                        | 0   |
| WP_065610756. | 51  | DQVKQGNNAYKAKYWTQNNDPATAGEWGAWQDLGSCSGDLVNIAPTVDLT           | 100 |
| VSAL_I1108    | 1   | --VKQGNNAYKAKYWTQNNDPATAGEWGAWQDLGSCSGDLVNIAPTVDLT           | 48  |
| WP_065610756. | 101 | SPSSTDNIAIGDIVTLTASAADS DGSVVRVDFSV DGSVIASSTSPYSAP          | 150 |
| VSAL_I1108    | 49  | SPSSTDNIAIGDIVTLTASAADS DGSVVRVDFSV DGSVIASSETS PYSTS        | 98  |
| WP_065610756. | 151 | WTALEGSHTFSAQSYDDKGA VSTESSVVAVTGTPTDNIAPTASLNLSAS           | 200 |
| VSAL_I1108    | 99  | WTALEGSHTFSAQSYDDKGA VSTESSVVAVTGTPTDNIAPMASLNLSAS           | 148 |
| WP_065610756. | 201 | SVELGAI VALTADATDS DGTIDKVD FVYVNN TLIGTRATAPYTLQYKTTAA      | 250 |
| VSAL_I1108    | 149 | SVELGAT VALTADATDS DGTIDKVD FVYVNN TLIGTTATAPYTLQYKTTSA      | 198 |
| WP_065610756. | 251 | GSLSVYAKATDNLGASTN SSPSTL TVTSSLPIADNCRPDGMYQTEGVNVP         | 300 |
| VSAL_I1108    | 199 | GSLSVYAKATDNLGASTN SS-STLTVTSSLPIADNCRPDGMYQTEGVNVP          | 247 |
| WP_065610756. | 301 | YCTVYDKEGRELMGADHP RRVI GYFTSWRDGGDDQNSYL VNDIPWEQLTH        | 350 |
| VSAL_I1108    | 248 | YCTVYDKEGRELMGADHP RRVI GYFTSWRDGGDDQNSYL VNDIPWEQLTH        | 297 |
| WP_065610756. | 351 | INYAFV SIGSDGNVNVGDV TDPNNAATGKEWAGVEIDPTLGFKGHFGALA         | 400 |
| VSAL_I1108    | 298 | INYAFV SIGSDGNVNVGDV TDPNNAATGKEWAGVEIDPTLGFKGHFGALA         | 347 |
| WP_065610756. | 401 | TAKAKHG VKTLISIGGWAETGGHFGTDG NR VADGGFYTM TTNADGSINQA       | 450 |
| VSAL_I1108    | 348 | TAKAKHDVKTLISIGGWAETGGHFGTDG NR VADGGFYTM TTNADGSINQA        | 397 |
| WP_065610756. | 451 | AIEKFAI SAVEMMRKYKF <b>DGLDIDYE</b> YPTSMAGAGNPDDKTFSESRRPYL | 500 |
| VSAL_I1108    | 398 | AIEKFAI SAVEMMRKYKF <b>DGLDIDYE</b> YPTSMAGAGNPDDKTFSESRRPYL | 447 |
| WP_065610756. | 501 | MKSYHELMRVLREKLDV ASSEDN IHYMLTIAAPSSAYLLRGMETMAVTKY         | 550 |
| VSAL_I1108    | 448 | MKSYHELMRVLREKLDV ASSEDN IHYMLTIAAPSSAYLLRGMETMAVTKY         | 497 |
| WP_065610756. | 551 | LDYVNIMS YDLHGAWNDHVGHNAALFDTGKDSELAQWSVYDTEAYGGIGY          | 600 |
| VSAL_I1108    | 498 | LDYVNIMS YDLHGAWNDHVGHNAALFDTGKDSELAQWSVYDTEAYGGIGY          | 547 |
| WP_065610756. | 601 | LNTDWA FHYFRGSM PAGRINIGV PYYTRGWQGV TGGENGLWGRAPLPDQA       | 650 |
| VSAL_I1108    | 548 | LNTDWA FHYFRGSM PAGRINIGV PYYTRGWQGV TGGENGLWGRAPLPDQA       | 597 |
| WP_065610756. | 651 | QCDAGTGE GEKNNCGY GALGIDNMWHDKNSYQEMGAGSNPMWHAKNLQE          | 700 |
| VSAL_I1108    | 598 | QCDAGTGE GEKNNCGY GALGIDNMWHDKNSYQEMGAGSNPMWHAKNLQE          | 647 |
| WP_065610756. | 701 | GIFGSYANI YGLDPAND PADKLVGT YTRHYDNVAVAPWLWNAEKKVFLST        | 750 |
| VSAL_I1108    | 648 | GIFGSYANI YGLDPAND PADKLVGT YTRHYDNVAVAPWLWNAEKKVFLST        | 697 |
| WP_065610756. | 751 | EDKASINVKADYVIDKE IGGIMFWELAGDYNCYVLDANGKRTSVDATEAA          | 800 |
| VSAL_I1108    | 698 | EDKASINVKADYVIDKE IGGIMFWELAGDYNCYVLDANGKRTSVDATEAA          | 747 |

```

WP_065610756.    801 CQTGNGEYHMGNTMTKAIYDKFAAATPYGNTVATGALPTETVDIAISIDG      850
      |.|||||
VSAL_I1108       748 CQTGNGEYHMGNTMTKAIYDKFAAATPYGNTVATGALPAETVDIAISIDG      797

WP_065610756.    851 FKVGDQNYYPINPKISFTNNTGQDIPGGTEFQFDIPVSAPDNAKDQSGGGL      900
      |.|||||
VSAL_I1108       798 FKVGDQNYYPINPKISFTNNTGQDIPGGTEFQFDIPVSAPDNAKDQSGGGL      847

WP_065610756.    901 QVIASGHTRADNIGGLDGMTMRVAFITLPAWKALPAGGVYELDMVYYLPIS      950
      |.|||||
VSAL_I1108       848 QVIASGHTRADNIGGLDGMTMHRIFAFTLPAWKAL-----              880

WP_065610756.    951 GPANYSVKINNIEYAFTFEQPDLPVADLSTGGGDNGGIPDAGCDATGLVT      1000
VSAL_I1108       881 -----              880

WP_065610756.   1001 YPDLPQTDVAGNPISHANTGDKIVHNNVIYQANWWT SATPGSDGSWTKVCN      1050
VSAL_I1108       881 -----              880

WP_065610756.   1051 L      1051
VSAL_I1108       881 -      880

```

**Figure S13.** Pairwise sequence alignment of VSAL\_I1108 (family GH18 chitinase fragment) and a *Aliivibrio logei* family GH18 chitinase (genebank accession WP\_065610756.1). The family GH18 catalytic chitinase sequence motif is indicated by yellow highlighting. The sequence alignment was made using EMBOSS Needle with default parameters.

```

WP_023603329.      1 MFKLALLPTLLACSFAANSITMTPQTDPLNPTGYVVSKAEIKAAEDAKTL      50
  |||
VSAL_I1414         1 MFKLALLPTLLACSFAANSITMTPQTDPLNPTGYVVSKAEIKAAEDAKTL      50

WP_023603329.     51 DPMYDVWAKALETRPNTVVDLIDVGSATNPENVKRVERVFPASEWFFLTQ      100
  |||
VSAL_I1414         51 DPMYDVWAKALETRPNTVVDLIDVGSATNPENVKRVERVFPDSEWFFLTQ      100

WP_023603329.    101 MAAPEYTYTRFLRAIGKFPFCGEYTDGRSDAICKKSIVTAFAHFSQET      150
  |||
VSAL_I1414        101 MAAPEYTYTRFLRAIGKFPFCGEYTDGRSDAICKKSIVTAFAHFSQET      150

WP_023603329.    151 GGHIADVNI SDNPLALEEWQQALVHVREMGWSEGQEGYTTGCGQNDWQNK      200
  |||
VSAL_I1414        151 GGHIADVNI SDNPLALEEWQQALVHVREMGWSEGQEGYTTGCGQNDWQNK      200

WP_023603329.    201 RWPCAAGQGYFGRGAKQLSYHFNYGAFSEVMYDGDATVLLDNPGIVADSW      250
  |||
VSAL_I1414        201 RWPCAAGQGYFGRGAKQLSYHFNYGAFSEVMYDGDATVLLDNPGVADSW      250

WP_023603329.    251 LNLASAIWFFLTPQAPKPAMLHVIDRTWSPSQRET DAGIGYGF GTTINVI      300
  |||
VSAL_I1414        251 LNLASAIWFFLTPQAPKPAMLHVIDRTWSPSQRET DAGIGYGF GTTINVI      300

WP_023603329.    301 NGGIECGEQNKDKGQPVNRIRYWEGLAKHYQIPVEADETNTCWQQT PYGS      350
  |||
VSAL_I1414        301 NGGIECGEQNKDKGQPVNRIRYWEGLAKHYQIPVEADETNTCWQQT PYGS      350

WP_023603329.    351 LNLNGATDVLYTNWDGNWKYYPDRPEGASFCELVGFQTAYSALVPGDYE      400
  |||
VSAL_I1414        351 LNLNGATDVLYTNWDGNWKYYPDRPEGASFCELVGFQTAYSALVPGDYE      400

WP_023603329.    401 KCVTNFYESHANWVTRVVETLPTDPTDPTGTPGDPNNTWDTNAVYNTGDQ      450
  |||
VSAL_I1414        401 KCVTNFYESHANWVTRVVETLPTDPTDPTGTPGDPNNTWDTNAVYNTGDQ      450

WP_023603329.    451 VVVDGVTYQAQWWNQGDNPATSTTGVLAVNAAVTPPAEPTPPAPIDPTP      500
  |||
VSAL_I1414        451 VVVDGVTYQAQWWNQGDNPATSTTGVLAVNAAVTPPVEPTPPAPIDPTP      500

WP_023603329.    501 VNPMPTEPTDPNSTWTAVGTYNTGDQVTVNGVIYQAQWWTQGNNPETSG      550
  |||
VSAL_I1414        501 VNPMP----- 506

WP_023603329.    551 DWGVWKKV          558

VSAL_I1414        507 ----- 506

```

**Figure S14.** Pairwise sequence alignment of VSAL\_I1414 (family GH19 chitinase fragment) and a *Aliivibrio logei* family GH19 chitinase (genbank accession WP\_065610756.1). The sequence alignment was made using EMBOSS Needle with default parameters.

|               |     |                                                              |     |
|---------------|-----|--------------------------------------------------------------|-----|
| WP_065612067. | 1   | MFKTKLGFCTAAITLALSAPTYAAVPGQAIISWMETDFSIIIDVDQAATSY          | 50  |
|               |     |                                                              |     |
| VSAL_I1942    | 1   | MFKTKLGFCTAAITLALSAPTYAAVPGQAIISWMETDFSIIIDVDQAATSY          | 50  |
| WP_065612067. | 51  | KNLVTVKEFAEVPVTWDRWSGESAETWKVLLNGQIVHEESISATASQKAS           | 100 |
|               |     |                                                              |     |
| VSAL_I1942    | 51  | KNLVTVKEFAEVPVTWDRWSGESAETWKVLLNGQIVHEESISATASQKAS           | 100 |
| WP_065612067. | 101 | TVLQVRQGGQYSMTVQLCNGTGAVEECSTSA PKDIVVADTDGSHLDPLPM          | 150 |
|               |     |                                                              |     |
| VSAL_I1942    | 101 | TVLQVRQGGQYSMTVQLCNGTGAVEECSTSA PKDIVVADTDGSHLDPLPM          | 150 |
| WP_065612067. | 151 | NIDPANGNYTTPEGMVSGAYFVEWGVYGRKFAVDQIPAQNLTHILYGFIP           | 200 |
|               |     |                                                              |     |
| VSAL_I1942    | 151 | NIDPANGNYTTPEGMVSGAYFVEWGVYGRKFAVDQIPAQNLTHILYGFIP           | 200 |
| WP_065612067. | 201 | ICGPNPSLGEIENGLAALNRACAGTPDYEVVIHDPWAAVQMPQPQSGH             | 250 |
|               |     |                                                              |     |
| VSAL_I1942    | 201 | ICGPNPSLGEIENGLAALNRACAGTPDYEVVIHDPWAAVQMPQPQSGH             | 250 |
| WP_065612067. | 251 | VHSTPYKGTYGQMMALKQRYPD LKIVPSIGGWTLSDFYDFVDKSKRDIF           | 300 |
|               |     |                                                              |     |
| VSAL_I1942    | 251 | VHSTPYKGTYGQMMALKQRYPD LKIVPSIGGWTLSDFYDFVDKSKRDIF           | 300 |
| WP_065612067. | 301 | VTSVKKFLKTWKFY <b>DGV DIDWE</b> FPGGDGASSTGGDPVNDGPAYVALMQEL | 350 |
|               |     |                                                              |     |
| VSAL_I1942    | 301 | VTSVKKFLKTWKFY <b>DGV DIDWE</b> FPGGDGASSTGGDPVNDGPAYVALMQEL | 350 |
| WP_065612067. | 351 | RAMLELSAETGKTYELTS AIGAGYDKIEDVDYAAASQYMDYIFAMTYDF           | 400 |
|               |     |                                                              |     |
| VSAL_I1942    | 351 | RAMLELSAETGKTYELTS AIGAGYDKIEDVDYAAASQYMDYIFAMTYDF           | 400 |
| WP_065612067. | 401 | FGGWNNVVGHQ TAVYCGSHMSQGECDGTGLDDKGEPRKGPAYTISNAIDL          | 450 |
|               |     |                                                              |     |
| VSAL_I1942    | 401 | FGGWNNVVGHQ TAVYCGSHMSQGECDGTGLDDKGEPRKGPAYTISNAIDL          | 450 |
| WP_065612067. | 451 | LLAQGVDAK KLVVAGMYARGWTGVTRESMTDPTNPMTGVGNGKVAGSWE           | 500 |
|               |     |                                                              |     |
| VSAL_I1942    | 451 | LLAQGVDAK KLVVAGMYARGWTGVTRESMTDPTNPMTGVGNGKVAGSWE           | 500 |
| WP_065612067. | 501 | AGVIDYKDVVTNYVNKAGVEVGYDDAAQAAFAYDPSNGDLITYDNKQSVL           | 550 |
|               |     |                                                              |     |
| VSAL_I1942    | 501 | AGVIDYKDVVTNYVNKAGVEVGYDDVAQAAFAYDPSNGDLITYDNKQSVL           | 550 |
| WP_065612067. | 551 | AKGEYVRS LGLGGLFAWEIDADNGDILNAMQEGLAGGTVTPPANKKPIAN          | 600 |
|               |     |                                                              |     |
| VSAL_I1942    | 551 | AKGEYVRS LGLGGLFAWEIDADNGDILNAMQEGLAGGTVTPPANKKPIAN          | 600 |
| WP_065612067. | 601 | AGVDIAVTT PATAQLDGLS SSSDGTIASYAWTQISGPAVALSNHNTVNA          | 650 |
|               |     |                                                              |     |
| VSAL_I1942    | 601 | AGVDIAVTT PATAQLDGLS SSSDGTITSYAWTQVSGPAVVL SNQNTVNA         | 650 |
| WP_065612067. | 651 | SFVTDGFIQSETLQFTLTVTDDK GATASDSVSVVVTVKGTPEVNTPPAV           | 700 |
|               |     |                                                              |     |
| VSAL_I1942    | 651 | SFVTDGFIQSETLQFTLTVTDDK GATASDSVSVVVTVKGTDPVNTPPAV           | 700 |
| WP_065612067. | 701 | IIAPSSVNKGDIVTL DASSSTDAESDPLTFTWAVPSGIDATVTGSTVTFI          | 750 |
|               |     |                                                              |     |
| VSAL_I1942    | 701 | IIAPSSVNKGDIVTL DASS-----                                    | 720 |

```

WP_065612067.    751 ADSYTVDTPLSFSVTANDGQASNTATVSVTVLKDAGDPPVTCDNAWDASV    800
VSAL_I1942       721 -----
WP_065612067.    801 VYNGGDQVSNSGKVWEAKWWTQGDDPSTSGDWGVWKEVGISACN    844
VSAL_I1942       721 -----

```

**Figure S15.** Pairwise sequence alignment of VSAL\_I1942 (family GH18 chitinase fragment) and a *Aliivibrio logei* family GH18 chitinase (genebank accession WP\_065612067.1). The family GH18 catalytic chitinase sequence motif is indicated by yellow highlighting. The sequence alignment was made using EMBOSS Needle with default parameters.

```

WP_017021178.    1 MENKFFKTTLLGAAIALASSGVTAKEVGINSDFNVEVYGVA AISLVNYNT    50
  |||
VSAL_I2352       1 MENKFFKTTLLGAAIALASSGVTAKEVGINSDFNVEVYGVA AISLVNYNT    50

WP_017021178.   51 TDNNDASSGYVVENESRIGFRAHKEMFENVLITMQIESGYVDSTDWP HGG    100
  |||
VSAL_I2352       51 TDNNDASSGYVVENESRIGFRAHKEMFENVLITMQIESGYVDSTDWP HGG    100

WP_017021178.  101 VSGGTLGFRDTFIGASGDWGNVRVGRVLTPLYELVDWPF SNPGLGSVFDW    150
  |||
VSAL_I2352       101 VSGGTLGFRDTFIGASGYWGNVCVGRVLTPLYELVDWPF SNPGLGSVFDW    150

WP_017021178.  151 GGIAGHYDRQSNQVRYDSPKFGGFSFATSVGRD-----DNDNGGGAA    192
  |||
VSAL_I2352       151 GGIAGHYDRQSNQVRYDSPKFGGFSFATSVGRDDNDNDNDNDNDNGGGAA    200

WP_017021178.  193 TRDSSFASANAKYSFEKVTLMGAVEAGSDFNGVAGQDNQSYLVGF EASLP    242
  |||
VSAL_I2352       201 TRDSSFASANAKYSFEKVTLMGAVEAGSDFNGVAGQDNQSYLVGF EASLP    250

WP_017021178.  243 AGFGIAAAYKVESLDNQAN-----KAGVSQSGVNVEQGSYSI IGQYWNGP    287
  |||
VSAL_I2352       251 AGFGIAAAYKVESLDNQATRLVFLKAVLM-----                279

WP_017021178.  288 IGFKLGYAANLESETNSKTDKSDSNTISGQLMAVHNGFV PYPYLRVAGRTV    337
  |||
VSAL_I2352       280 -----                279

WP_017021178.  338 GDADTDIVTRVGL EYGF    354
  |||
VSAL_I2352       280 -----                279

```

**Figure S16.** Pairwise sequence alignment of VSAL\_I2352 (porin fragment) and a *Aliivibrio logei* family porin (genebank accession WP\_017021178.1). The sequence alignment was made using EMBOSS Needle with default parameters.

## Supplementary tables

**Table S1.** Growth rate measurements and max cell density of *Al. salmonicida* cultivated in glucose, GlcNAc and GlcNAc<sub>2</sub>

| Carbon source       | Rate constant $\mu$ (hours <sup>-1</sup> ) | Generation time (hours) | Max cell density (OD <sub>600</sub> ) |
|---------------------|--------------------------------------------|-------------------------|---------------------------------------|
| Glucose             | 0.065 ± 0.025                              | 5.36 ± 2.17             | 2.63 ± 0.094                          |
| GlcNAc              | 0.069 ± 0.029                              | 5.16 ± 2.00             | 1.31 ± 0.022                          |
| GlcNAc <sub>2</sub> | 0.055 ± 0.021                              | 4.95 ± 0.89             | 1.58 ± 0.145                          |

Mean ± SD of three biological replicates.

**Table S2.** Identified CAZymes sorted by their putative biological processes, according to gene ontology (GO) annotations.

| CAZy                                                                            | Uniprot | Biological process                                    |
|---------------------------------------------------------------------------------|---------|-------------------------------------------------------|
| <b>Carbohydrate metabolic process [GO:0005975]</b>                              |         |                                                       |
| AA10                                                                            | B6EQJ6  | AsLPMO10B                                             |
| CBM73;GH18                                                                      | B6EH15  | AsChi18A                                              |
| GH13_19                                                                         | B6EGT4  | MalS (Alpha-amylase)                                  |
| GH20                                                                            | B6EGV7  | VSAL_I2989 (Putative beta-N-acetylhexosaminidase)     |
| GT35                                                                            | B6EQ29  | MalP (Alpha-1,4 glucan phosphorylase)                 |
| GH77                                                                            | B6EQ30  | MalQ (4-alpha-glucanotransferase)                     |
| GH3                                                                             | B6ERJ6  | NagZ (Beta-hexosaminidase)*                           |
| <b>Chitin binding [GO:0008061]</b>                                              |         |                                                       |
| AA10;CBM73                                                                      | B6EQB6  | AsLPMO10A                                             |
| <b>Cell cycle, cell division, protein import [GO:0007049/ 0051301/ 0017038]</b> |         |                                                       |
| PL22                                                                            | B6EGK3  | TolB (Tol-Pal system protein TolB)                    |
| <b>Formaldehyde catabolic process [GO:0046294]</b>                              |         |                                                       |
| CE1                                                                             | B6EH03  | YeiG (S-formylglutathione hydrolase)                  |
| <b>Glycogen biosynthetic process [GO:0005978]</b>                               |         |                                                       |
| GT5                                                                             | B6EQL7  | GlgA (Glycogen synthase)                              |
| <b>Lipid A biosynthetic process [GO:0009245]</b>                                |         |                                                       |
| CE11                                                                            | B6ELH0  | LpxC (UDP-3-O-acyl-N-acetylglucosamine deacetylase)   |
| GT19                                                                            | B6EJW7  | LpxB (Lipid-A-disaccharide synthase)                  |
| <b>Lipopolysaccharide biosynthetic process [GO:0009103]</b>                     |         |                                                       |
| GT9                                                                             | B6EPB8  | RfaF (ADP-heptose-LPS heptosyltransferase II)         |
| <b>Peptidoglycan metabolic process [GO:0000270]</b>                             |         |                                                       |
| GH23                                                                            | B6EJV5  | MltD (Membrane-bound lytic murein transglycosylase D) |
| GH23                                                                            | B6EGC8  | Slt (Soluble lytic murein transglycosylase)           |
| <b>Trehalose catabolic process [GO:0005993]</b>                                 |         |                                                       |
| GH13_29                                                                         | B6ERJ9  | TreA (Trehalose-6-phosphate hydrolase)                |
| <b>Not assigned</b>                                                             |         |                                                       |
| GH103                                                                           | B6EIW0  | VSAL_I1069 (Putative exported protein)                |
| GT2                                                                             | B6EKR9  | VSAL_I1407 (Putative glycosyl transferase)            |
| GT51                                                                            | B6EM36  | MrcA (Penicillin-binding protein 1A)                  |

\*Also, Cell cycle [GO:0007049];cell division [GO:0051301];cell wall organization [GO:0071555];peptidoglycan biosynthetic process [GO:0009252];peptidoglycan turnover [GO:0009254];regulation of cell shape [GO:0008360]



## Supplementary references

1. Kashulin A, Sørum H, Hjerde E, Willassen NP. 2015. IS elements in *Aliivibrio salmonicida* LFI1238: Occurrence, variability and impact on adaptability. *Gene* 554:40-49.
2. Suginta W, Chuenark D, Mizuhara M, Fukamizo T. 2010. Novel beta-*N*-acetylglucosaminidases from *Vibrio harveyi* 650: cloning, expression, enzymatic properties, and subsite identification. *BMC Biochem* 11:40.
